# Supplementary material for: Response of chlorinated hydrocarbon transformation and microbial community structure in an aquifer to joint H2 and O2
Source: Royal Society of Chemistry journal article supplement (doi:10.1039/d2ra04185e), 2022-01-01
Supplement: d2ra04185e1.pdf [file d2ra04185e1.pdf]

1  
2  
3  
4  
5  
6  
7  
8  
9  
10  
11  
12

## Supplementary Information

### **Response of chlorinated hydrocarbons transformation and microbial community structure in the aquifer to joint H<sub>2</sub> and O<sub>2</sub>**

Cui Li,<sup>a</sup> Rong Chen,<sup>b</sup> Hui Liu,<sup>a,c\*</sup> Yao Huang,<sup>a</sup> Jintao Yu,<sup>a</sup> Weiwei Ouyang<sup>a</sup> and Chen Xue<sup>a</sup>

<sup>a</sup> *School of Environmental Studies, China University of Geosciences, Wuhan, Hubei 430078, PR China*

<sup>b</sup> *School of Environmental and Biological Engineering, Wuhan Technology and Business University,  
Wuhan, Hubei 430065, PR China*

<sup>c</sup> *State Key Laboratory of Biogeology and Environmental Geology, China University of Geosciences,  
Wuhan, Hubei 430078, PR China*

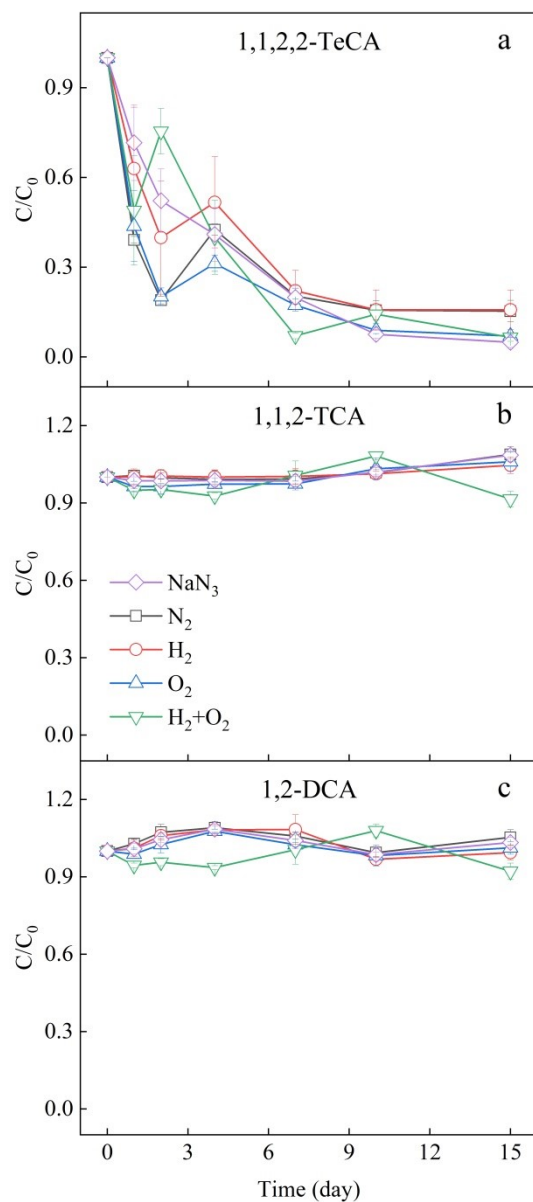

13

14 **Fig. S1 Concentrations of chlorinated ethanes (1,1,2,2-TeCA (a), 1,1,2-TCA (b), 1,2-DCA**

15 **(c)) with time in different microcosms of  $\text{H}_2$  and  $\text{O}_2$  microcosms and with  $\text{NaN}_3$  as abiotic**

16 **control**

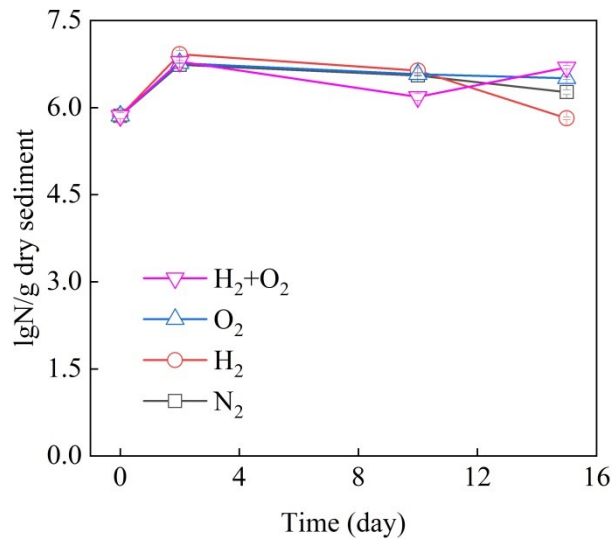

17

18

**Fig. S2 Microbial numbers in different times of incubation in the four microcosms**

19

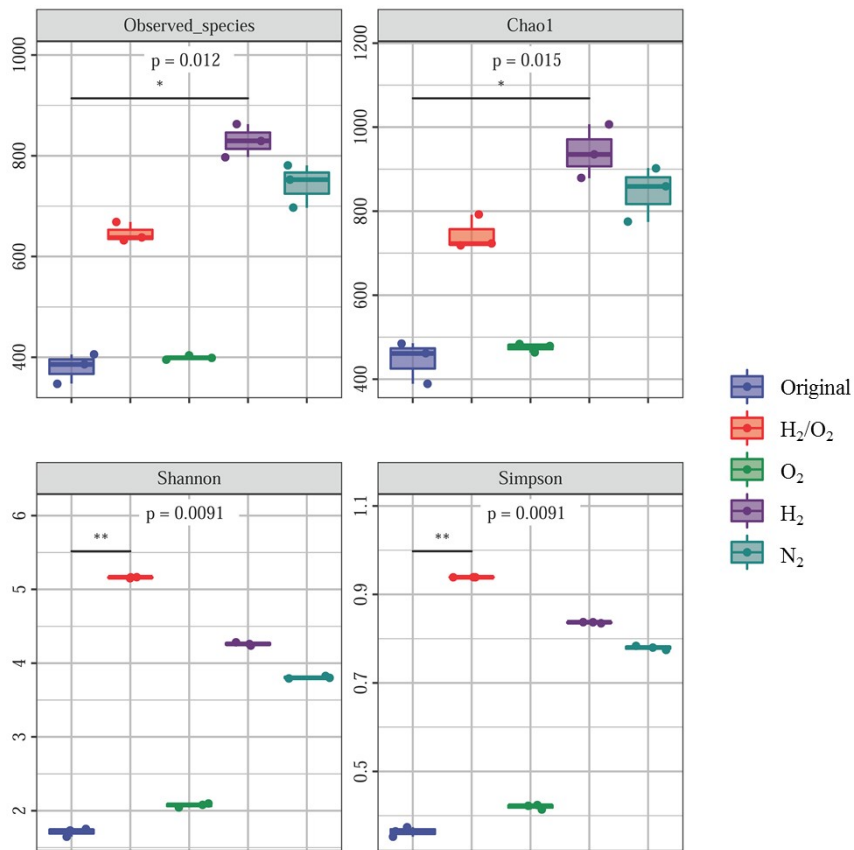

20

21

**Fig. S3 Microbial diversity indices of the sediments before and after 15-days of incubation in**

22

**the four microcosms**

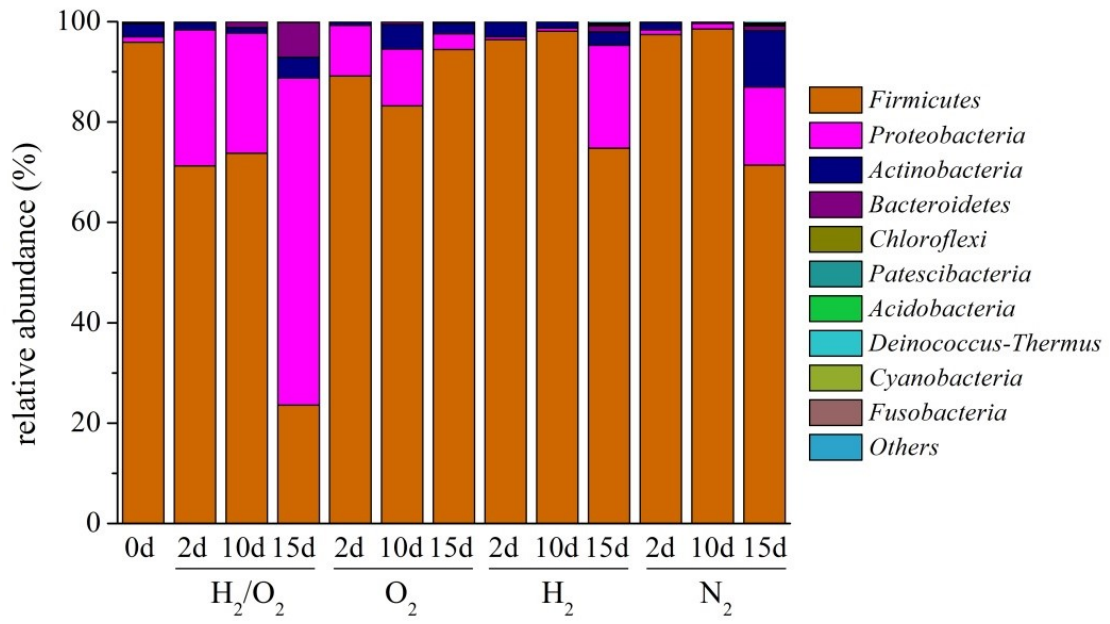

23

24

**Fig. S4 Microbial composition at phylum level in different experimental microcosms**

25

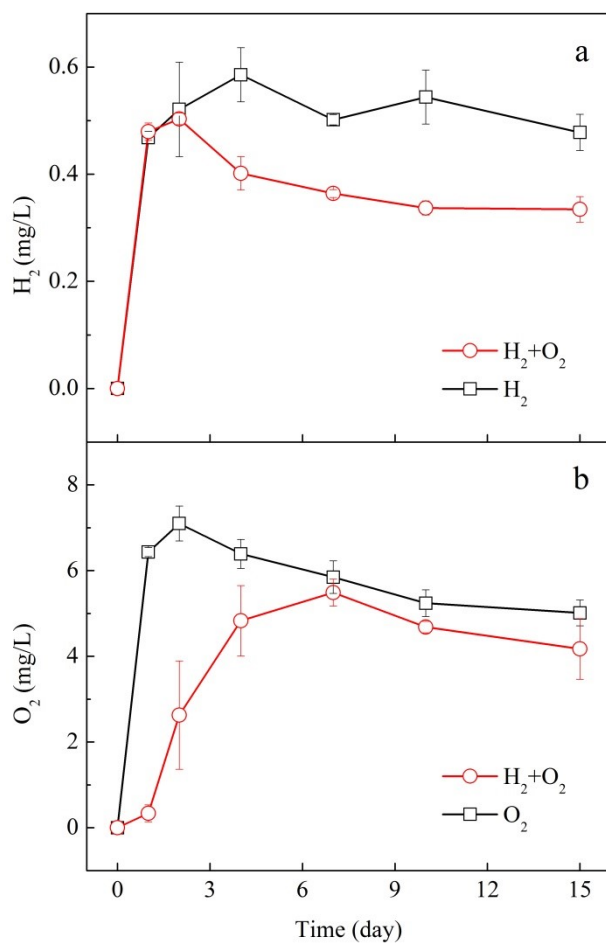

26

27 **Fig. S5 Variations of H<sub>2</sub> (a) and O<sub>2</sub> (b) concentrations during chlorinated hydrocarbons**

28 **degradation**

29

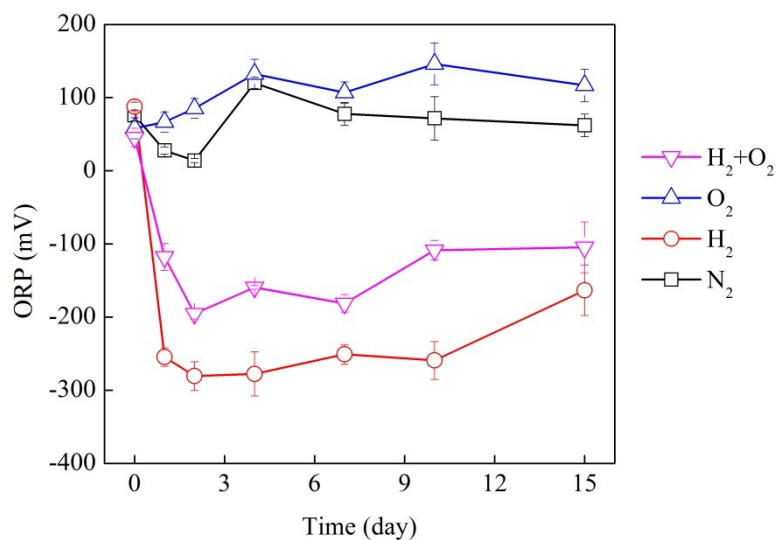

30

31 **Fig. S6 Variations of oxidation-reduction potential (ORP) during chlorinated hydrocarbons**

32 **degradation**

33

Table S1 Sediments properties used in this study

| Contaminant                  | Concentration<br>(mg/kg) | Cation | Concentration<br>(mg/g) | Anion                         | Concentration<br>(mg/kg) |
|------------------------------|--------------------------|--------|-------------------------|-------------------------------|--------------------------|
| Perchloroethylene            | 2.78 ± 0.22              | Fe     | 13.14                   | Cl <sup>-</sup>               | 189.44                   |
| Trichloroethylene            | 171.41 ± 0.84            | K      | 2.37                    | SO <sub>4</sub> <sup>2-</sup> | 66.05                    |
| <i>cis</i> -Dichloroethene   | 88.51 ± 14.42            | Na     | 0.62                    | NO <sub>3</sub> <sup>-</sup>  | 34.64                    |
| <i>trans</i> -Dichloroethene | 0.78 ± 0.07              | Ca     | 20.79                   | PO <sub>4</sub> <sup>3-</sup> | 20.12                    |
| Vinyl chloride               | 12.1 ± 1.75              | Mg     | 7.39                    | F <sup>-</sup>                | 24.31                    |
| 1,1,2-Trichloroethane        | 2.75 ± 0.32              | P      | 0.32                    |                               |                          |
| 1,2-Dichloroethane           | 4.46 ± 0.73              | Al     | 9.81                    |                               |                          |
| 1,1-Dichloroethane           | 1.38 ± 0.19              | Mn     | 0.32                    |                               |                          |
| Chloroform                   | 0.29 ± 0.04              | Si     | 33.57                   |                               |                          |
| Chlorobromomethane           | 0.28 ± 0.03              | Li     | 2.37                    |                               |                          |
|                              |                          | Ti     | 0.38                    |                               |                          |

35 **Note:** TOC content of sediments was 1360 mg/kg, pH value was 7.4.

Table S2 Material balance and variance analysis of CHCs in microcosms

| Pollutants                   | Conditions                       | Concentration ( $\mu\text{M}$ ) |            |           | Transformation rate (%) | P-value  |    |
|------------------------------|----------------------------------|---------------------------------|------------|-----------|-------------------------|----------|----|
|                              |                                  | 0 day                           | 15 day     | variation |                         |          |    |
| Perchloroethylene            | N <sub>2</sub> +NaN <sub>3</sub> | 47.36±1.43                      | 30.62±0.14 | -16.74    | -35.35                  | 3.53E-05 | ** |
|                              | N <sub>2</sub>                   | 43.86±4.56                      | 29.44±0.68 | -14.42    | -32.88                  | 5.63E-03 | ** |
|                              | H <sub>2</sub>                   | 52.38±3.64                      | 29.89±0.89 | -22.49    | -42.94                  | 4.82E-04 | ** |
|                              | O <sub>2</sub>                   | 41.10±2.92                      | 21.84±0.72 | -19.26    | -46.86                  | 3.76E-04 | ** |
|                              | H <sub>2</sub> +O <sub>2</sub>   | 30.15±0.41                      | 20.95±1.33 | -9.2      | -30.51                  | 3.35E-04 | ** |
| Trichloroethylene            | N <sub>2</sub> +NaN <sub>3</sub> | 27.14±0.65                      | 48.46±0.48 | 21.32     | 78.56                   | 7.26E-04 | ** |
|                              | N <sub>2</sub>                   | 40.56±3.15                      | 35.99±4.2  | -4.57     | -11.27                  | 0.21     |    |
|                              | H <sub>2</sub>                   | 43.31±2.48                      | 36.22±3.32 | -7.09     | -16.37                  | 4.14E-02 | *  |
|                              | O <sub>2</sub>                   | 40.10±3.42                      | 40.54±4.56 | 0.44      | 1.10                    | 0.90     |    |
|                              | H <sub>2</sub> +O <sub>2</sub>   | 40.56±3.15                      | 23.49±2.34 | -17.07    | -42.09                  | 1.66E-03 | ** |
| <i>trans</i> -Dichloroethene | N <sub>2</sub> +NaN <sub>3</sub> | 31.45±0.81                      | 31.23±0.36 | -0.22     | -0.70                   | 0.70     |    |
|                              | N <sub>2</sub>                   | 29.67±1.75                      | 30.71±0.56 | 1.04      | 3.51                    | 0.38     |    |
|                              | H <sub>2</sub>                   | 32.80±1.56                      | 30.60±0.93 | -2.2      | -6.71                   | 0.10     |    |
|                              | O <sub>2</sub>                   | 30.21±1.45                      | 26.50±0.16 | -3.71     | -12.28                  | 1.14E-02 | *  |
|                              | H <sub>2</sub> +O <sub>2</sub>   | 26.79±0.47                      | 12.20±0.55 | -14.59    | -54.46                  | 4.01E-06 | ** |
| Carbon tetrachloride         | N <sub>2</sub> +NaN <sub>3</sub> | 31.92±1.09                      | 24.22±2.11 | -7.7      | -24.12                  | 4.94E-03 | ** |
|                              | N <sub>2</sub>                   | 28.56±2.18                      | 15.46±0.65 | -13.1     | -45.87                  | 5.68E-04 | ** |
|                              | H <sub>2</sub>                   | 33.55±2.63                      | 9.64±0.48  | -23.91    | -71.27                  | 1.02E-04 | ** |
|                              | O <sub>2</sub>                   | 27.39±1.52                      | 21.97±0.73 | -5.42     | -19.79                  | 5.12E-03 | ** |
|                              | H <sub>2</sub> +O <sub>2</sub>   | 34.15±0.84                      | 25.87±1.11 | -8.28     | -24.25                  | 4.91E-04 | ** |
| Chloroform                   | N <sub>2</sub> +NaN <sub>3</sub> | 33.80±0.82                      | 34.68±0.53 | 0.88      | 2.60                    | 0.20     |    |
|                              | N <sub>2</sub>                   | 33.28±1.10                      | 37.70±0.42 | 4.42      | 13.28                   | 2.90E-03 | ** |
|                              | H <sub>2</sub>                   | 32.55±0.70                      | 40.82±1.25 | 8.27      | 25.41                   | 5.57E-04 | ** |
|                              | O <sub>2</sub>                   | 31.68±1.16                      | 31.86±0.29 | 0.18      | 0.57                    | 0.81     |    |
|                              | H <sub>2</sub> +O <sub>2</sub>   | 35.77±0.94                      | 28.49±0.97 | -7.28     | -20.35                  | 7.39E-04 | ** |
| Dichloromethane              | N <sub>2</sub> +NaN <sub>3</sub> | 28.33±1.72                      | 29.81±0.69 | 1.48      | 5.22                    | 0.24     |    |
|                              | N <sub>2</sub>                   | 28.02±0.95                      | 31.71±0.74 | 3.69      | 13.17                   | 6.06E-03 | ** |
|                              | H <sub>2</sub>                   | 29.18±0.90                      | 30.47±1.14 | 1.29      | 4.42                    | 0.20     |    |
|                              | O <sub>2</sub>                   | 29.86±1.16                      | 30.19±0.61 | 0.33      | 1.11                    | 0.69     |    |
|                              | H <sub>2</sub> +O <sub>2</sub>   | 24.80±0.40                      | 22.27±0.92 | -2.53     | -10.20                  | 1.21E-02 | *  |
| 1,1,2,2-Tetrachloroethane    | N <sub>2</sub> +NaN <sub>3</sub> | 28.81±3.90                      | 1.38±0.35  | -27.43    | -95.21                  | 2.66E-04 | ** |
|                              | N <sub>2</sub>                   | 30.67±1.14                      | 4.70±1.14  | -25.97    | -84.68                  | 9.77E-06 | ** |
|                              | H <sub>2</sub>                   | 26.86±2.89                      | 4.28±2.08  | -22.58    | -84.07                  | 3.90E-04 | ** |
|                              | O <sub>2</sub>                   | 26.39±2.72                      | 1.83±0.16  | -24.56    | -93.07                  | 9.85E-05 | ** |
|                              | H <sub>2</sub> +O <sub>2</sub>   | 24.56±4.23                      | 1.61±0.36  | -22.95    | -93.44                  | 7.25E-04 | ** |
| 1,1,2-Trichloroethane        | N <sub>2</sub> +NaN <sub>3</sub> | 29.10±0.44                      | 31.58±0.08 | 2.48      | 8.52                    | 6.40E-04 | ** |
|                              | N <sub>2</sub>                   | 28.98±0.60                      | 31.52±0.27 | 2.54      | 8.76                    | 2.64E-03 | ** |
|                              | H <sub>2</sub>                   | 28.90±1.04                      | 30.22±1.27 | 1.32      | 4.57                    | 0.24     |    |
|                              | O <sub>2</sub>                   | 28.88±1.17                      | 30.57±0.30 | 1.69      | 5.85                    | 0.07     |    |
|                              | H <sub>2</sub> +O <sub>2</sub>   | 24.69±0.63                      | 22.57±0.35 | -2.12     | -8.59                   | 7.18E-03 | ** |
| 1,2-Dichloroethane           | N <sub>2</sub> +NaN <sub>3</sub> | 28.99±0.54                      | 29.96±0.10 | 0.97      | 3.35                    | 3.83E-02 | *  |
|                              | N <sub>2</sub>                   | 29.23±0.47                      | 30.77±0.50 | 1.54      | 5.27                    | 1.78E-02 | *  |
|                              | H <sub>2</sub>                   | 30.03±0.94                      | 29.84±1.28 | -0.19     | -0.63                   | 0.85     |    |
|                              | O <sub>2</sub>                   | 29.88±0.93                      | 30.23±0.21 | 0.35      | 1.17                    | 0.56     |    |
|                              | H <sub>2</sub> +O <sub>2</sub>   | 25.52±0.36                      | 23.51±0.66 | -2.01     | -7.88                   | 9.69E-03 | ** |

37 \* Significance at P &lt; 0.05, \*\* Significance at P &lt; 0.01
